# Supplementary material
Source: PubMed Central journal article supplement (PMC8581884)
Supplement: ajtr0013-11271-f7.pdf [file ajtr0013-11271-f7.pdf]

## Supplementary File 1

### Supplementary methods

#### *RNA extraction and quantitative real-time polymerase chain reaction (qRT-PCR)*

Hemolysis of serum specimens was tested to remove potential contaminants. We routinely assessed the degree of overall RNA integrity to analyze RNA quality. Samples exhibiting an RNA integrity number (RIN) value greater than 7 as determined on an Agilent 2100 Bioanalyzer were included in the analysis. miRNA was isolated from serum samples with a miRNeasy Mini Kit (Qiagen). A total of 500  $\mu$ l of serum was used for each experiment. For the detection of miR-18a-5p in serum samples, a synthetic *C. elegans* miRNA (cel-miRNA-39) was used as an internal control due to the lack of universal endogenous controls. miR-18a-5p primers were obtained from Takara Bio (sequences protected by a patent). Other primers were obtained from Sangon Biotech, and detailed primer sequence information is listed in [Supplementary Table 1](#).

Enriched small RNAs from serum were reverse transcribed with a TaqMan MicroRNA Reverse Transcription Kit (Applied Biosystems). The expression of selected miRNAs, cel-miR-39 (for normalization of serum) and U6 (for normalization of cultured cells) was tested with a TaqMan miRNA assay (Applied Biosystems).

Total RNA from cells was extracted using TRIzol reagent (Invitrogen, USA). The RNA concentration and integrity were determined by spectrophotometry and standard RNA gel electrophoresis, respectively. RNA was reverse transcribed into cDNA using a Primer-Script One-Step RT-PCR kit (TaKaRa, Dalian, China). The cDNA template was amplified by real-time PCR using a SYBR Premix DimerEraser kit (TaKaRa). Real-time PCR was performed using specific primers ([Supplementary Table 1](#)) for GAPDH, TSP1, IGF1, LIF, CCND2, NACC1 and MMP1 obtaining from Sangon Biotech. CTGF primers were obtained from Takara Bio (sequences protected by a patent). The mean cycle threshold (CT) value for each sample was analyzed using the  $2^{-\Delta\Delta CT}$  method. All the reactions were performed in triplicate.

#### *Cell proliferation assay*

Cell viability was measured using the Cell Counting Kit-8 (CCK-8) assay (Dojindo Laboratories, Kumamoto, Japan). After transfection for 48 hours, HUVECs were seeded into 96-well plates at a density of  $1 \times 10^3$  cells per well in 100  $\mu$ l of medium. Subsequently, 10  $\mu$ l of CCK-8 solution with 90  $\mu$ l medium was added to each well at the indicated time points. After incubation at 37°C for 90 min, the absorbance at 450 nm was measured with a plate reader. The growth curves were examined to determine the growth rates.

#### *Transwell assay*

HUVECs were seeded into the upper chamber of Transwell® cell culture inserts with an 8  $\mu$ m pore size (Costar-Corning, USA) in serum-free medium. The lower chamber was filled with MEM- $\alpha$  supplemented with 10% FBS. After an incubation period of 48 h, the cells on the upper surface of the membrane were removed with a cotton swab, while cells in the bottom of the chamber were fixed with 70% ethanol and stained with 0.5% crystal violet solution for 30 min at room temperature. A light microscope was used to count the number of migrated cells (4 random fields per chamber).

#### *Wound healing assay*

HUVECs were plated in 6-well plates at a density of  $2 \times 10^6$  cells per well. After 24 h, wounds were generated using sterilized pipette tips, and the medium was substituted with serum-free medium. Images of the plates in the same field of view were observed and captured 48 h later.

#### *In vitro tube formation assay*

## miR-18a-5p/TSP1/P53 signaling regulates venous malformation

In vitro tube formation assays were performed in 96-well plates coated with 50  $\mu$ l of Matrigel Basement Membrane Matrix, Growth Factor Reduced (Corning, 354230), which was heated at 37°C for 30 min to allow gel formation. Then,  $2 \times 10^4$  HUVECs subjected to various transfections in MEM- $\alpha$  containing 2% FBS were seeded onto the Matrigel and incubated at 37°C for 8 h. The formation of tubes and tube-like structures was captured 8 h later using a Nikon Eclipse 80i microscope (Nikon, Japan).

### *RNA immunoprecipitation (RIP)*

HUVECs ( $2 \times 10^6$ ) were seeded onto 10 cm tissue culture plates and transfected with 4  $\mu$ g of FLAG-AGO2 and 25 nM scr/mimic miR-18a-5p using Lipofectamine 2000 (Life). HUVECs were transfected with pBSKS (an empty plasmid) as a negative control. After transfection for 48 hours, cells were washed with ice-cold 1 $\times$  PBS, scraped, and transferred to a 1.5 ml tube, followed by centrifugation at 200 $\times$ g for 2 min. The cells were then resuspended in 200  $\mu$ l of cold resuspension buffer (20 mM Tris (pH = 7.5), 150 mM NaCl, 1 mM EDTA, 1 mM EGTA) containing 1 U/ $\mu$ l RNasin Plus (Promega) and lysed by the addition of 800  $\mu$ l of cold lysis buffer (1% Triton X-100, 20 mM Tris (pH = 7.5), 150 mM NaCl, 1 mM EDTA, 1 mM EGTA, 1 mM phenylmethyl-sulfonyl fluoride (PMSF, Sigma), 1X complete EDTA-free Protease Inhibitor cocktail (Roche) and incubation on ice for 10-30 min. After centrifugation (10,000 $\times$ g for 10 min at 4°C), 10  $\mu$ l of RQ1 DNase (Promega) was added to the supernatant. IP of FLAG-AGO2 was performed with anti-FLAG M2 mouse antibody (Sigma, F3165) for 3 h at 4°C with rotation. After undergoing five washes with lysis buffer, 10% of the sample beads were subjected to protein extraction and WB by adding LDS sample buffer and DTT and heating the samples at 70°C for 20 min. The remaining 90% of the sample beads were incubated with RQ1 DNase for 30 min for later RNA extraction with TRIzol (Invitrogen, USA).

### *Establishment of an animal model of VM*

Six-week-old athymic BALB/c nu/nu male mice (purchased from ProMedican Pharmaceutical Co.) were used to establish the VM model. HUVECs ( $5 \times 10^6$ ) stable cell lines which expressing TIE2 protein (WT or L914F mutation) were subcutaneously inoculated into either side of the flank area in an equivalent volume of Matrigel (n = 3 for each group). The lesions were harvested 2 weeks after inoculation and subjected to HE staining. For the miR-18a-5p treatment experiment, HUVECs with the TIE2-L914F mutation were transfected with miR-18a-5p mimic, inhibitor or vehicle for 72 h before subcutaneous injection into mice as previously described (n = 6 per group). The lesion area was measured with Vernier calipers every 3 days, and the final lesions were harvested at 18 days after inoculation. The weight of lesions and the vessel structures were observed after HE staining. All animal experiments were performed in the animal laboratory center of the Ninth People's Hospital, Shanghai Jiaotong University School of Medicine (Shanghai, China), and were conducted in accordance with the Guide for the Care and Use of Laboratory Animals published by the US National Institutes of Health (NIH publication number 85-23, revised 1996). The study protocol was approved by the Animal Care and Use Committee of the Ninth People's Hospital (SH9H-2019-A486-1).

miR-18a-5p/TSP1/P53 signaling regulates venous malformation

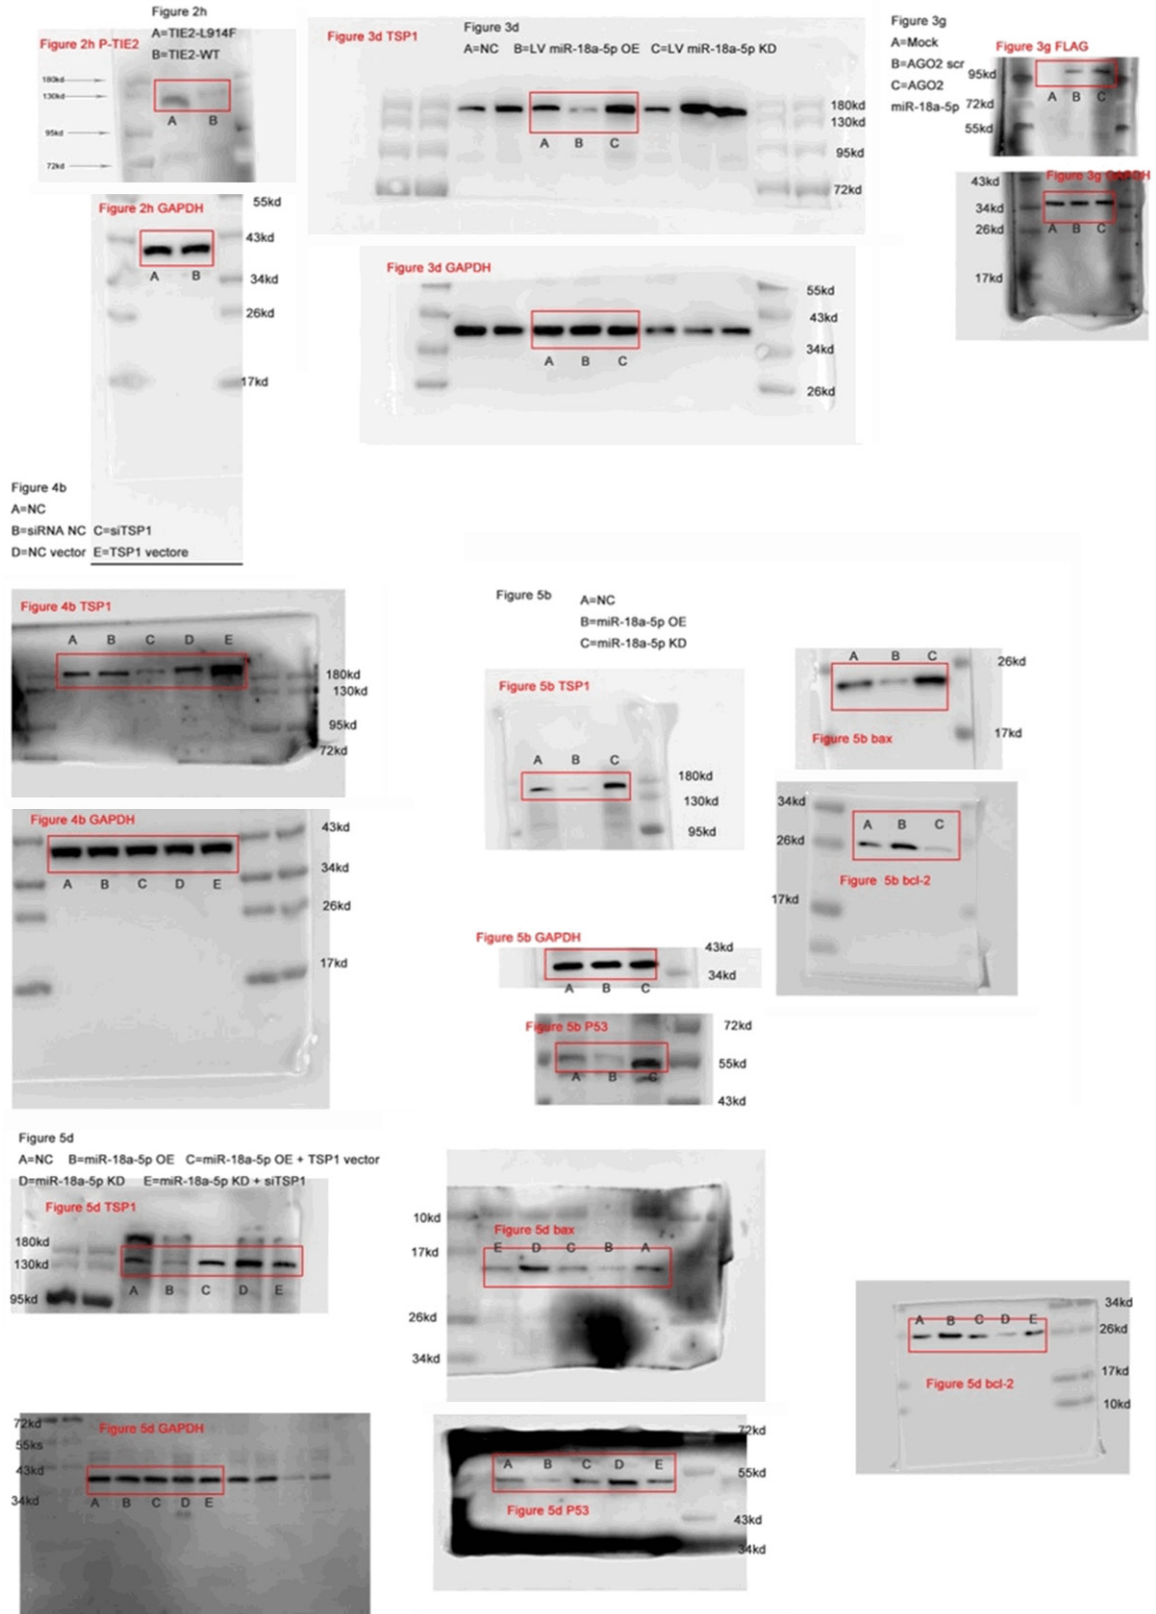

Supplementary Figure 1. Original, full-length gel and blot images.

miR-18a-5p/TSP1/P53 signaling regulates venous malformation

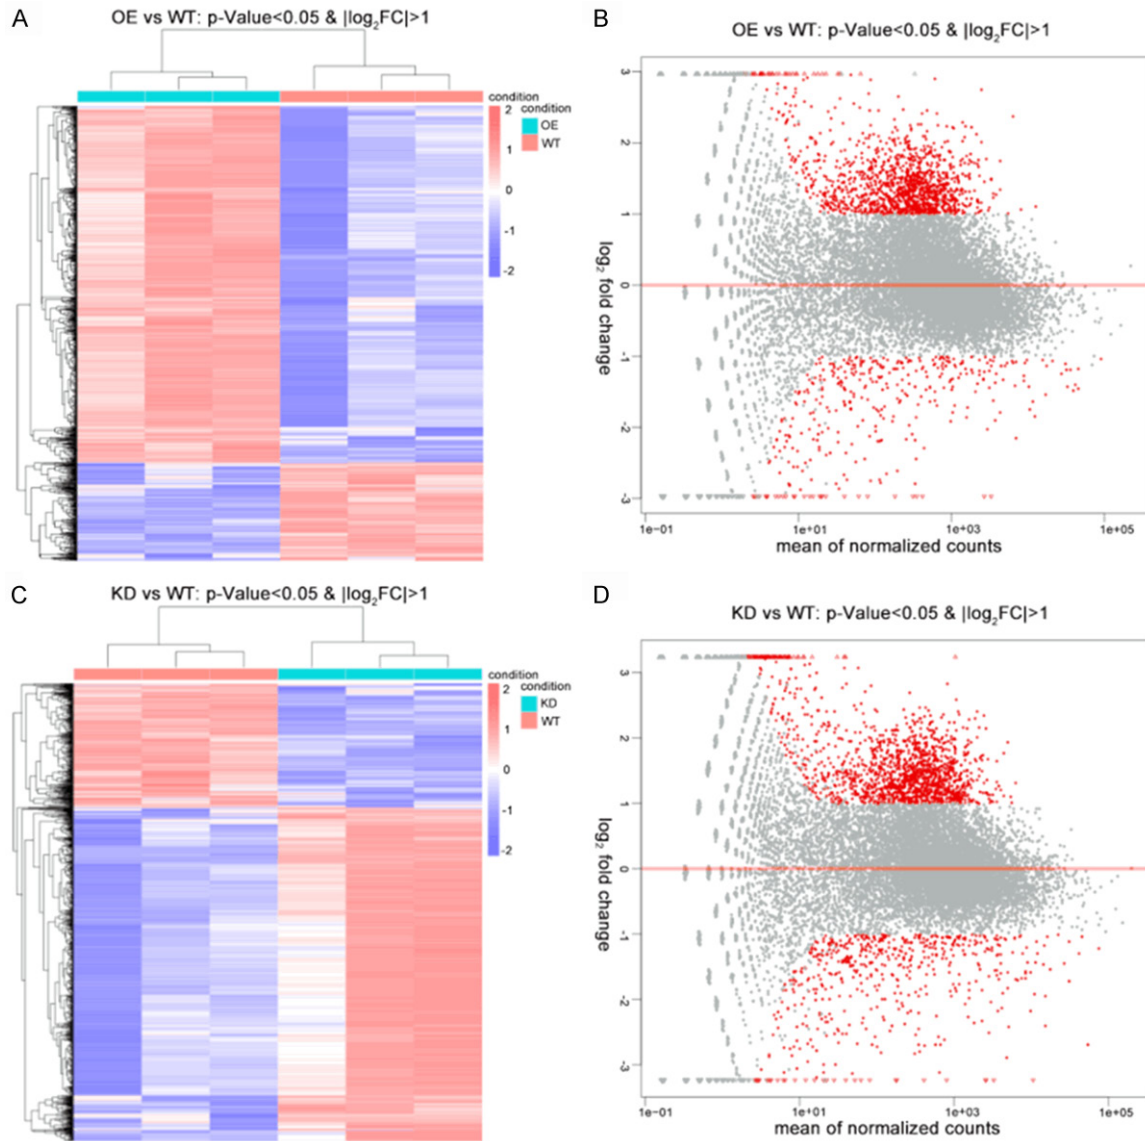

**Supplementary Figure 2.** A, C. A heatmap showing the genes differentially expressed between the miR-18-5p changed group and the control group as indicated via RNA-seq is shown. B, D. Volcano plot showing all differentially expressed genes between the miR-18-5p changed group and the control group as indicated via RNA-seq is shown.

miR-18a-5p/TSP1/P53 signaling regulates venous malformation

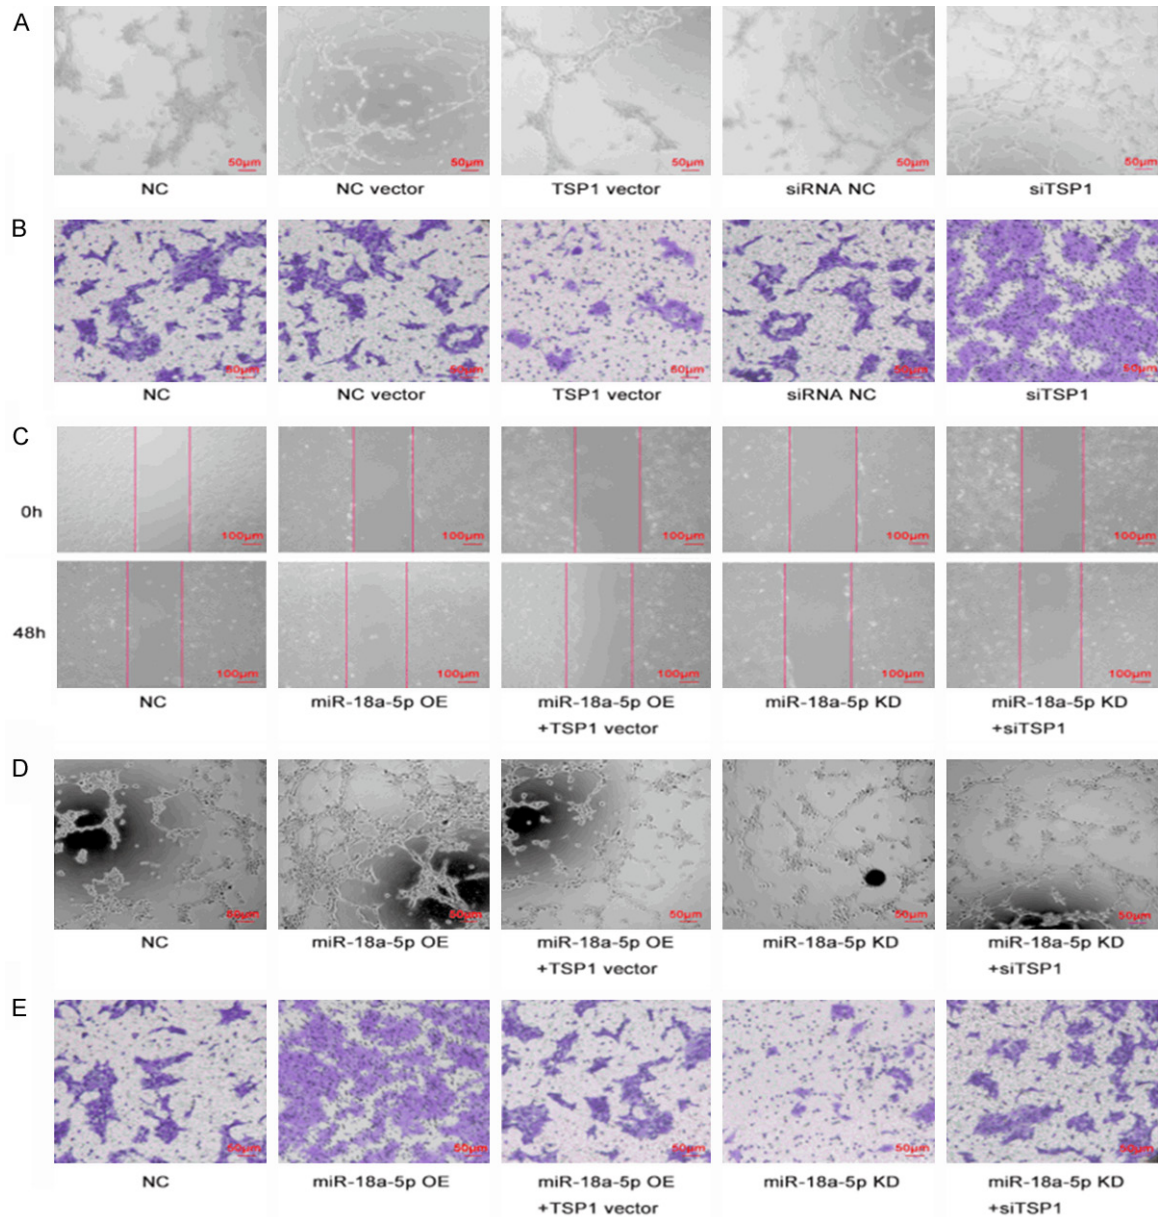

**Supplementary Figure 3.** (A, B) Angiogenesis and migration of HUVECs transfected with NC, NC vector, TSP1 vector, siRNA NC or siTSP1 were evaluated by tube formation (A) and transwell assays (B), respectively. (C-E) Invasion, angiogenesis and migration of HUVECs transfected with NC, miR-18a-5p OE, miR-18a-5p OE + TSP1 vector, miR-18a-5p KD and miR-18a-5p KD + siTSP1 were evaluated by wound healing (C), tube formation (D) and transwell assays (E), respectively.

miR-18a-5p/TSP1/P53 signaling regulates venous malformation

A

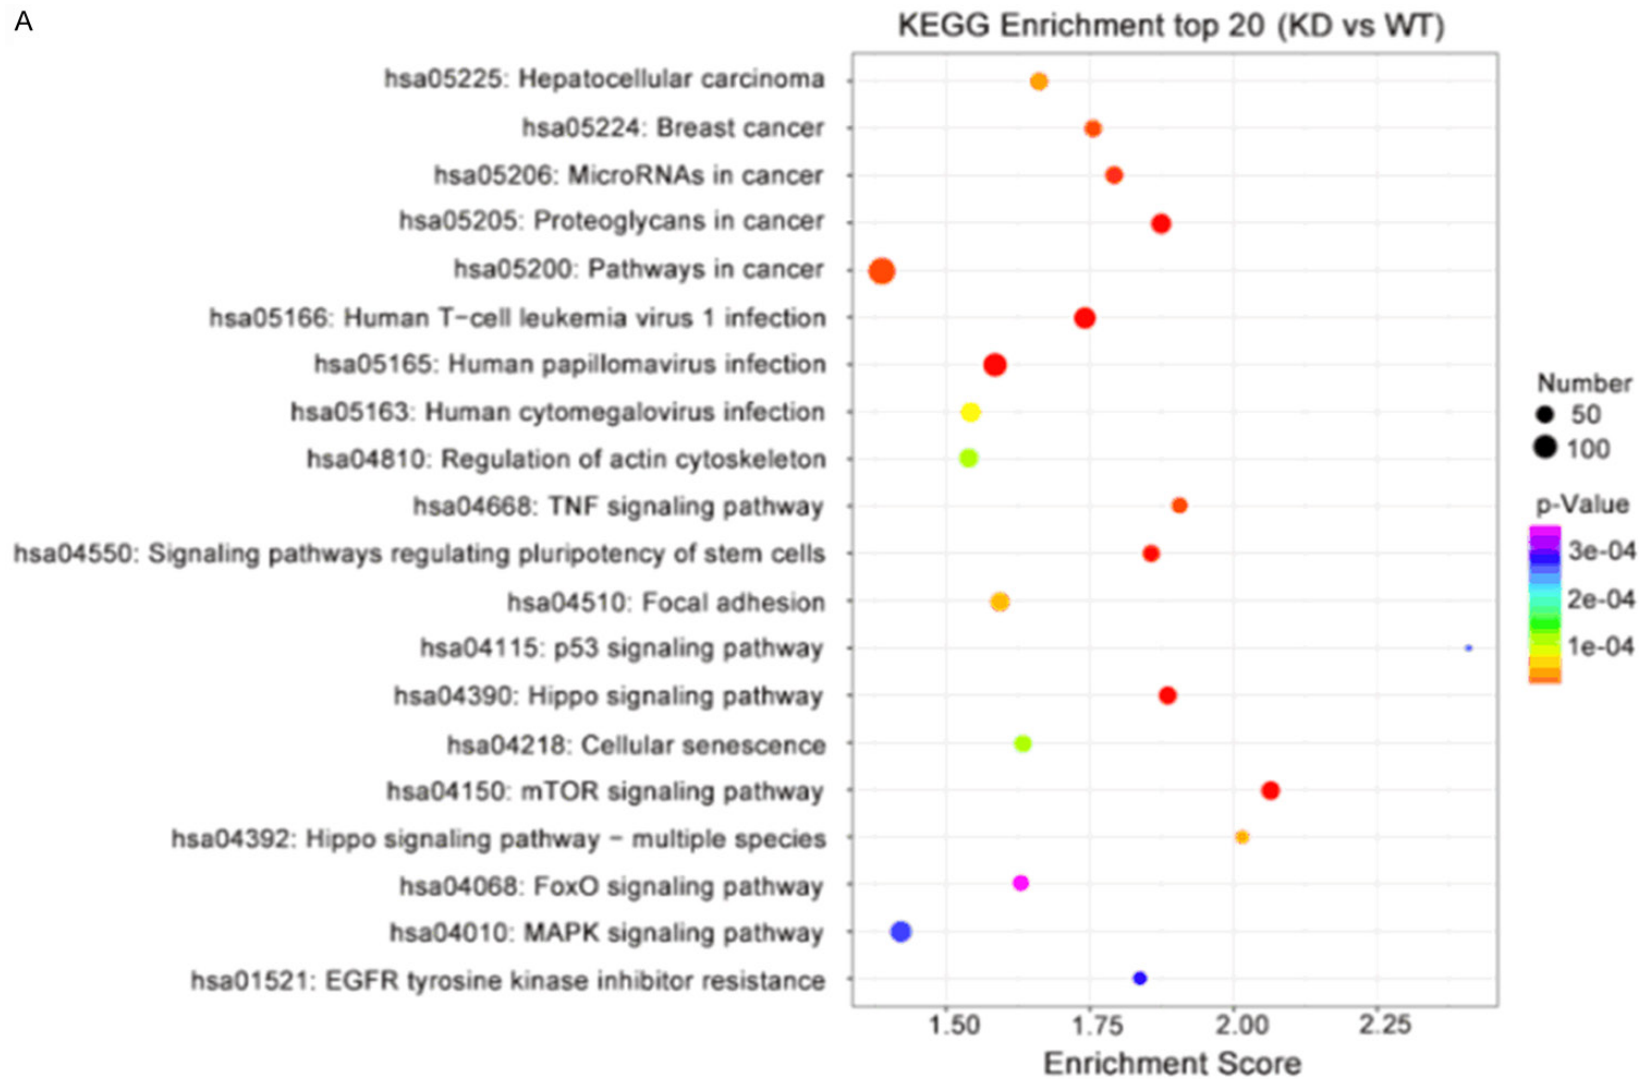

B

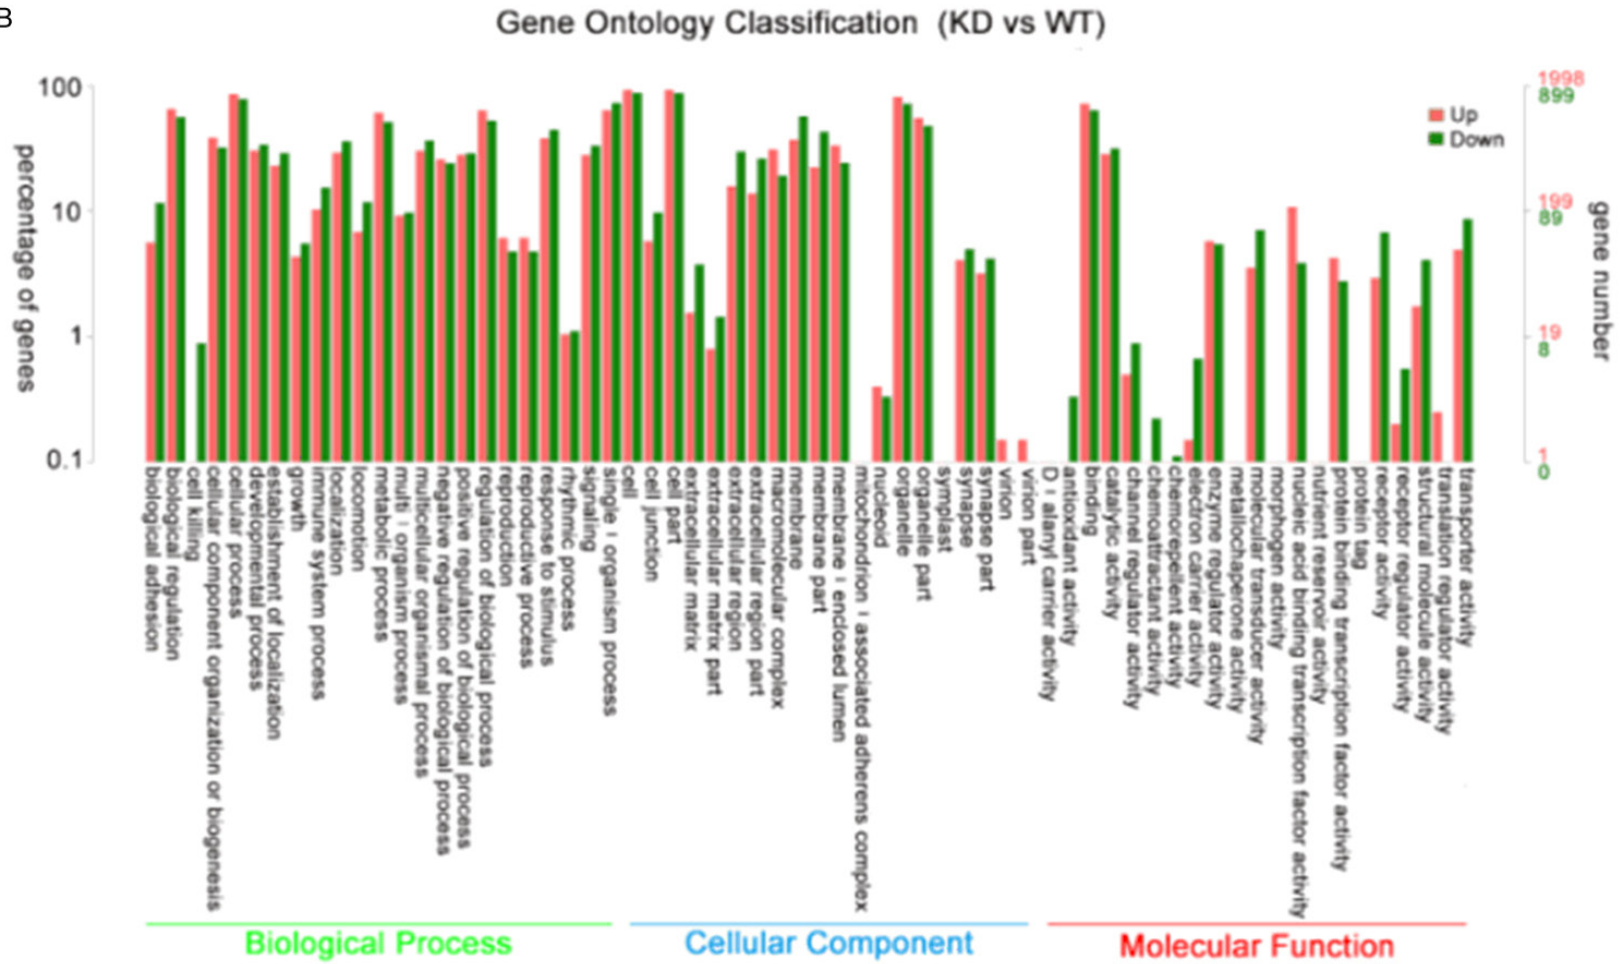

C

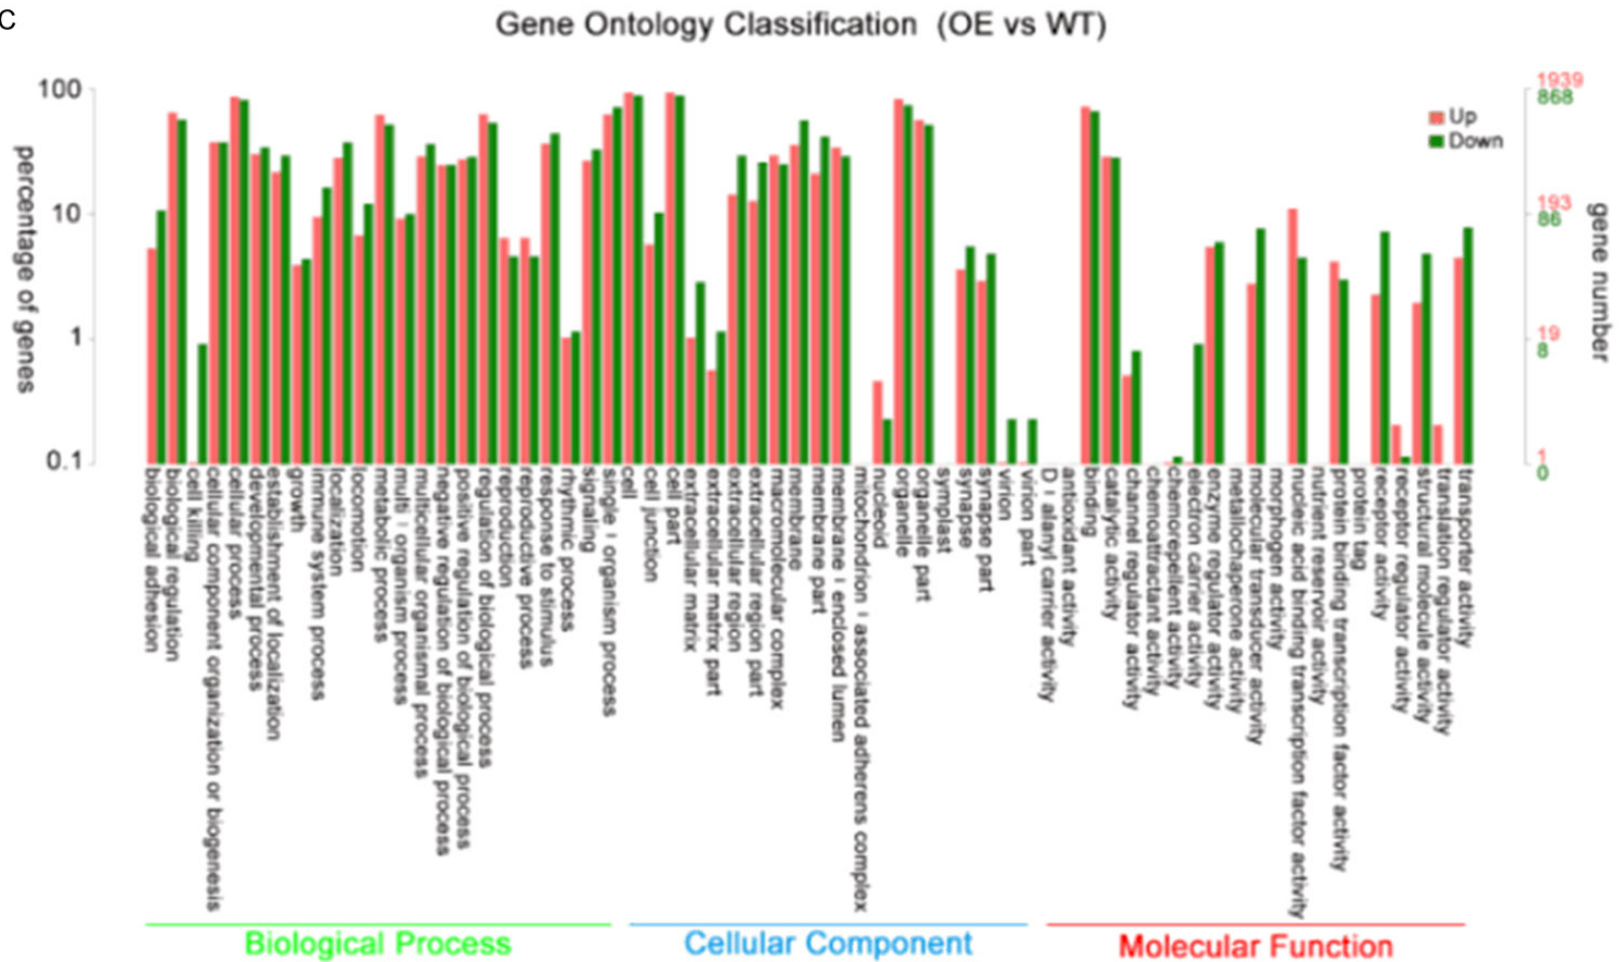

**Supplementary Figure 4.** (A) KEGG analysis was used to identify pathway terms enriched in the dysregulated mRNAs in HUVECs with miR-18a-5p KD vs WT. (B, C) GO term enrichment analysis of the biological process (BP), cellular component (CC) and molecular function (MF) categories for the dysregulated mRNAs (B: KD vs WT, C: OE vs WT).



## miR-18a-5p/TSP1/P53 signaling regulates venous malformation

**Supplementary Table 1.** Primers of genes used for this study

| Primer     | Sequences                                                                                  |
|------------|--------------------------------------------------------------------------------------------|
| Cel-miR-39 | Forward Primer 5'-CAGAGTCACCG GGTGTAAT-3'<br>Reverse Primer 5'-CCAGTGC GTGTCGTGGAGTC-3'    |
| U6         | Forward Primer 5'-CTCGCTTCGGCAGCACATATACT-3'<br>Reverse Primer 5'-ATTTGCGTGCATCCTTGCGCA-3' |
| TSP-1      | Forward Primer 5'-GCCATCCGCTAACTACATT-3'<br>Reverse Primer 5'-TCCGTTGTGATAGCATAGGGG-3'     |
| IGF1       | Forward Primer 5'-GCTCTTCAGTTCGTGTGGA-3'<br>Reverse Primer 5'-GCCTCCTTAGATCACAGCTCC-3'     |
| NACC1      | Forward Primer 5'-CTCTCCCGCTGAACTTATCA-3'<br>Reverse Primer 5'-AGCGTGTCCGGTCAAAGAA-3'      |
| LIF        | Forward Primer 5'-GCATCAACTCCGAGCTTAG-3'<br>Reverse Primer 5'-CTGAACGCCATAGCCAGGTCT-3'     |
| CCND2      | Forward Primer 5'-ACCTTCGCAGTGCTCCTA-3'<br>Reverse Primer 5'-CCCAGCCAAGAAACGGTCC-3'        |
| MMP1       | Forward Primer 5'-AAAATTACAGCCAGATTTGCC-3'<br>Reverse Primer 5'-GGTGTGACATTACTCCAGAGTTG-3' |
| GAPDH      | Forward Primer 5'-GGAGCGAGATCCCTCCAAAAT-3'<br>Reverse Primer 5'-GGCTGTTGCATACTTCTCATGG-3'  |
